# Supplementary material for: Habitat selection of the margay (Leopardus wiedii) in the eastern Andean foothills of Ecuador
Source: publisher site journal article supplement (doi:10.1515/mammalia-2013-0070), 2014-01-01
Supplement: Supplementary file 1 [file Hodge_MargayHabitatSelection_Supplementary.doc]

**Table S1**. The number of camera stations with positive margay detections across four transects within the Wildsumaco Wildlife Sanctuary, Ecuador. Habitat variables were recorded for all stations—those detecting margays as well as those with no detections. The sum of individual margays across transects is higher than the total of 12 individuals, due to detection of some individuals on multiple transects.

| Transect | Number of Camera Stations | Number of Stations Margays Present | Proportion of Stations Margays Present | Number of Individual Margays Detected |
| --- | --- | --- | --- | --- |
| F.A.C.E. | 13 | 11 | 0.846 | 6 |
| Benavides | 13 | 7 | 0.538 | 6 |
| Waterfall | 13 | 10 | 0.769 | 4 |
| Puffbird | 12 | 6 | 0.5 | 2 |

**Table S2**. Capture histories for each individual margay, showing number of detections per transect and total captures for each individual. Individual captures sum to less than the total of 89 detections due to some camera series being so close-range or partial that they could be neither verified nor excluded as known distinct individuals.

|  |  | Number of Detections Per Transect: | | | |  |
| --- | --- | --- | --- | --- | --- | --- |
| Individual | Sex | F.A.C.E. | Benavides | Waterfall | Puffbird | Total |
| 1 | M | 13 | 2 | 8 | 7 | 30 |
| 2 | U | 1 | 1 | 0 | 0 | 2 |
| 3 | M | 2 | 0 | 0 | 0 | 2 |
| 4 | F | 1 | 0 | 0 | 0 | 1 |
| 5 | U | 1 | 0 | 0 | 0 | 1 |
| 6 | F | 3 | 0 | 0 | 0 | 3 |
| 7 | U | 0 | 3 | 0 | 0 | 3 |
| 8 | F | 0 | 6 | 0 | 0 | 6 |
| 9 | F | 0 | 2 | 0 | 0 | 2 |
| 10 | M | 0 | 0 | 7 | 0 | 7 |
| 11 | F | 0 | 0 | 14 | 0 | 14 |
| 12 | F | 0 | 0 | 4 | 0 | 4 |

**Table S3**. Number of detections of individual margays of each sex on each of four transects at the Wildsumaco Wildlife Sanctuary, Ecuador. M = male; F = female; U = undetermined.

|  |  | Number of Detections Per Transect: | | | |  |
| --- | --- | --- | --- | --- | --- | --- |
| Sex | N | F.A.C.E. | Benavides | Waterfall | Puffbird | Total |
| M | 3 | 15 | 2 | 15 | 7 | 39 |
| F | 6 | 4 | 8 | 18 | 0 | 30 |
| U | 3 | 2 | 4 | 0 | 0 | 6 |
